# Supplementary material for: Successful Treatment of Severe Paravalvular Leak by Repositioning a Self-Expandable Percutaneous Aortic Valve Bioprosthesis (Evolut PRO+) Using the “Double Snare” Technique
Source: Case Rep Cardiol. 2022 Apr 5;2022:4458109. doi: 10.1155/2022/4458109 (PMC9005318; doi:10.1155/2022/4458109)
Supplement: Supplementary Materials — The transesophageal echocardiogram videos are shown in https://drive.google.com/drive/folders/1huM-u0rMZXKcDuiqL0_ebIHZGE1T1Hst?usp=sharing. Video 1: Five-chamber view severe PVL pre-repositioning. Video 2: Deep transgastric view severe PVL pre-repositioning. Video 3: Short-axis view severe PVL pre-repositioning. Video 4: Long-axis view mild PVL post-repositioning. Video 5: Deep transgastric view mild PVL post-repositioning. [file 4458109.f1.zip]

Archive with 6 entries (6 files):
- 1. 5-chamber view severe PVL pre-repositioning.mp4
- 2. Transgastric view severe PVL pre-repositioning.mp4
- 3. Short-axis view severe PVL pre-repositioning.mp4
- 4. Long-axis view mild PVL post-repositioning.mp4
- 5. Transgastric view mild PVL post-repositioning.mp4
- Video Legends for supplementary material description.docx
