# Supplementary material for: Successful Treatment of Severe Paravalvular Leak by Repositioning a Self-Expandable Percutaneous Aortic Valve Bioprosthesis (Evolut PRO+) Using the “Double Snare” Technique
Source: Case Rep Cardiol. 2022 Apr 5;2022:4458109. doi: 10.1155/2022/4458109 (PMC9005318; doi:10.1155/2022/4458109)
Supplement: Supplementary Materials — The transesophageal echocardiogram videos are shown in https://drive.google.com/drive/folders/1huM-u0rMZXKcDuiqL0_ebIHZGE1T1Hst?usp=sharing. Video 1: Five-chamber view severe PVL pre-repositioning. Video 2: Deep transgastric view severe PVL pre-repositioning. Video 3: Short-axis view severe PVL pre-repositioning. Video 4: Long-axis view mild PVL post-repositioning. Video 5: Deep transgastric view mild PVL post-repositioning. [file 4458109.f1.zip › Video Legends for supplementary material description.docx]

**Title: Successful treatment of severe paravalvular leak by repositioning a self-expandable percutaneous aortic valve bioprosthesis (Evolut PRO+) using the “double snare” technique**

Diego H. González-Bravo, MD1 (MD); Pedro Colón-Hernández, MD3 (MD); Melanie Quintana-Serrano, MD1 (MD); Sergio Alegre-Boschetti, MD1 (MD); Juan Vázquez-Fuster, MD1 (MD); José J. Acevedo-Valles, MD1,2 (MD); and Eric Avilés-Rivera, MD1,3 (MD)

1Cardiovascular Division, Department of Medicine,

VA Caribbean Healthcare System, San Juan, Puerto Rico.

2Internal Medicine Division, Department of Medicine,

VA Caribbean Healthcare System, San Juan, Puerto Rico.

3Cardiovascular Center, Menonita Medical Center, Cayey, Puerto Rico.

**Video Legends** (<https://drive.google.com/drive/folders/1huM-u0rMZXKcDuiqL0_ebIHZGE1T1Hst?usp=sharing>)

[**Video 1:**](https://drive.google.com/file/d/1BjZm9s-stkSAOdtA5o6yoxxqkWrebAmf/view?usp=sharing)Transesophageal echocardiogram mid-esophageal 5-chamber view prior to valve repositioning showing severe paravalvular leak due to late ventricular transcatheter valve embolization and migration. Ventricular migration and embolization of the Evolut PRO+ bioprosthesis is causing impingement of the anterior mitral valve leaflet resulting in its restrictive opening. The low-lying bioprosthesis is causing severe paravalvular leak by color Doppler that is posteriorly directed and traveling back to the ventricle during diastole between the bioprosthesis and the aorto-mitral curtain.

[**Video 2:**](https://drive.google.com/file/d/14iM27FtKxo-JbzcN2P6x2OjRewhfH5NX/view?usp=sharing) Transesophageal echocardiogram deep trans-gastric view with color Doppler showing severe paravalular leak prior to valve repositioning. Paravalvular regurgitation jet has a large vena contracta (diameter=0.6cm, area=0.57cm2) which is suggestive of a severe leak. A dilated and dysfunctional left ventricle can also be appreciated.

[**Video 3:**](https://drive.google.com/file/d/1sbXZ4awJapS8Zc-7LTl0h9vMrOxQQ17m/view?usp=sharing) Transesophageal echocardiogram mid-esophageal short-axis view showing severe paravalvular leak before valve repositioning using the “double snare” technique. Paravalvular leak involves approximately 50% of the bioprosthesis circumference which favors the presence of severe regurgitation.

[**Video 4:**](https://drive.google.com/file/d/11mpCdT5qPbij7AN7TNDP2ZEQu2eng84C/view?usp=sharing) Transesophageal echocardiogram mid-esophageal long-axis view showing interval improvement of severe paravalvular leak to a mild degree after valve repositioning using the “double snare” technique. Evolut PRO+ bioprosthesis is not further causing impingement against the anterior mitral valve leaflet after being repositioned to a higher level. Mild functional mitral regurgitation is present.

[**Video 5:**](https://drive.google.com/file/d/1keBgJjmHGkj5yyrMbgyCqHwlVok-LVjY/view?usp=sharing) Transesophageal echocardiogram deep trans-gastric view with color Doppler showing improvement of severe paravalvular leak to a mild degree after successful valve repositioning. Pressure half-time of the severe paravalvular leak improved from 126 to 490msec in favor of a residual mild leak.
